# Supplementary material
Source: HighWire-hosted journal article supplement (https://ijgc.bmj.com/highwire/filestream/20281/field_highwire_adjunct_files/0/ijgc-2021-002794supp001_data_supplement.pdf)
Supplement: ijgc-2021-002794supp001_data_supplement.pdf [file ijgc-2021-002794supp001_data_supplement.pdf]

**Used Surgical Materials**

- Deaver and Richardson retractors
- Vascular retractors
- Plastic tapes
- Aspirator
- Cautery
- Ultrasonic device
- Right angle
- Clamps
- Clips
